# Supplementary material for: How do ecosystem service functions affect ecological health? Evidence from the Yangtze River Economic Belt in China
Source: Royal Society of Chemistry journal article supplement (doi:10.1039/d4em00296b), 2024-01-01
Supplement: d4em00296b1.pdf [file d4em00296b1.pdf]

## Supporting Information

# How do ecosystem service functions affect ecological health? Evidence from the Yangtze Economic Belt in China

*Jie Yu*<sup>a</sup>, *Wei Wang*<sup>bc</sup>, *Guishan Yang*<sup>c</sup>, *Chao Wu*<sup>b</sup>

<sup>a</sup> Renmin Middle School of Nanjing, Nanjing 210008, China

<sup>b</sup> School of Management, Nanjing University of Posts and Telecommunications, Nanjing 210009, China;

<sup>c</sup> Nanjing Institute of Geography and Limnology, Chinese Academy of Sciences, Nanjing 210008, China;

## CONTENTS

### List of Figures

Figure. S1 Location and characteristics of the Yangtze River Economic Belt

Figure. S2 Spatio-temporal distribution of ecological health index in the Yangtze River Economic Belt

Figure. S3 Distribution of ecological health index in Yangtze River Economic Belt

Figure. S4 Spatio-temporal distribution of ecosystem services in the Yangtze River Economic Belt

Figure. S5 Distribution of ecosystem service index in Yangtze River Economic Belt

Figure. S6 Distribution of influence coefficient of ecosystem service index on ecological health index in Yangtze River Economic Belt

### List of Tables

Text S1. Comprehensive index evaluation

### List of Tables

Table S1 Weights of ecological health evaluation index

Table S2 Estimated results of the OLS model from 1990 to 2020

## Supplemental Experimental

Text S1. Comprehensive index evaluation

1) Assume that there are  $m$  evaluation objects, and each object has  $n$  evaluation indexes. Based on this, the judgment matrix is constructed as Equation (1):

$$X = (x_{ij})_{m \times n} (i = 1, 2, \dots, m; j = 1, 2, \dots, n) \quad (1)$$

2) Standardize the judgment matrix:

The positive index and negative index are shown as follows:

$$x'_{ij} = \frac{x_{ij} - \min(x_{ij})}{\max(x_{ij}) - \min(x_{ij})} \quad (2)$$

$$x'_{ij} = \frac{\max(x_{ij}) - x_{ij}}{\max(x_{ij}) - \min(x_{ij})} \quad (3)$$

3) Calculate information entropy:

$$H_j = -k \sum_{i=1}^m p_{ij} \ln p_{ij} \quad (4)$$

where  $p_{ij} = \frac{x'_{ij}}{\sum_{i=1}^m x'_{ij}}; k = \frac{1}{\ln m}$ .

4) Determine the weight of index  $j$  :

$$w_j = \frac{1 - H_j}{\sum_{j=1}^n (1 - H_j)} \quad (5)$$

where  $w_j \in [0, 1], \sum_{j=1}^n w_j = 1$ . The weights of each index of the ecological health evaluation system are shown in the table S1.

5) Calculate the weighted matrix:

$$R = (r_{ij})_{m \times n}, r_{ij} = w_j \times x_{ij} (i = 1, 2, \dots, n) \quad (6)$$

6) Determine the optimal solution  $S_j^+$  and worst solution  $S_j^-$  :

$$S_j^+ = \max(r_{1j}, r_{2j}, \dots, r_{nj}), S_j^- = \min(r_{1j}, r_{2j}, \dots, r_{nj}) \quad (7)$$

7) Calculate the Euclidean distance between the optimal solution and the worst solution of each scheme:

$$sep_i^+ = \sqrt{\sum_{j=1}^n (s_j^+ - r_{ij})^2}, sep_i^- = \sqrt{\sum_{j=1}^n (s_j^- - r_{ij})^2} \quad (8)$$

8) Calculate the comprehensive evaluation index:

$$C_i = \frac{sep_i^-}{sep_i^+ + sep_i^-}, C_i \in [0,1] \quad (9)$$

In the formula, when the value of  $C_i$  is larger, the evaluation object is better.

Table S1 Weights of ecological health evaluation index

| Target Layer     | Criterion Layer                    | Index Level                        | Weight relative to the criterion layer | Weight relative to the target layer |
|------------------|------------------------------------|------------------------------------|----------------------------------------|-------------------------------------|
| Ecosystem Health | Ecological Vitality<br>(0.355)     | NDVI                               | 0.432                                  | 0.153                               |
|                  |                                    | NPP                                | 0.135                                  | 0.048                               |
|                  |                                    | LST                                | 0.433                                  | 0.154                               |
|                  |                                    | Spread index                       | 0.212                                  | 0.053                               |
|                  | Ecological Organization<br>(0.252) | Shannon uniformity                 | 0.146                                  | 0.037                               |
|                  |                                    | Shannon Diversity                  | 0.376                                  | 0.095                               |
|                  |                                    | Dispersion and juxtaposition index | 0.266                                  | 0.067                               |
|                  | Ecological Restoration<br>(0.393)  | Ecological Resistance Index        | 0.543                                  | 0.213                               |
|                  |                                    | Ecological Resilience Index        | 0.457                                  | 0.180                               |

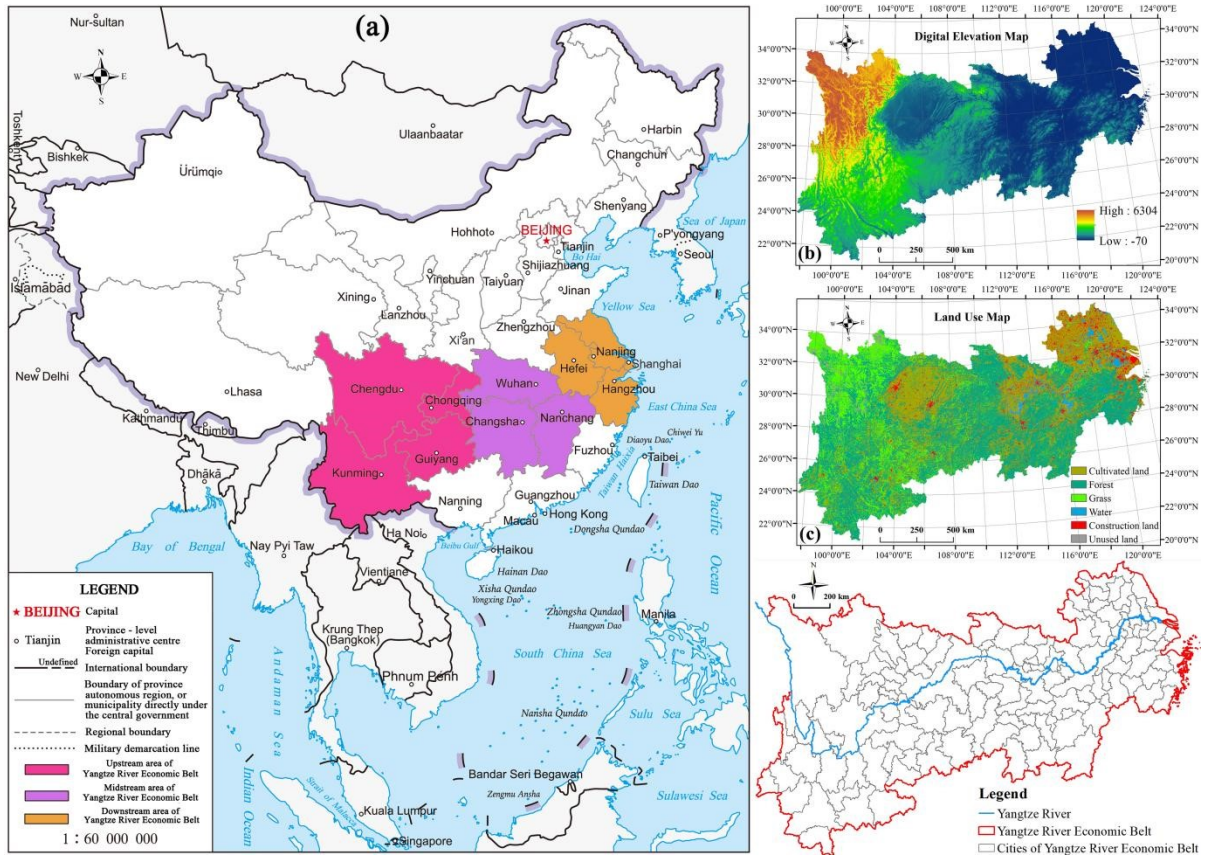

Figure. S1 Location and characteristics of the Yangtze River Economic Belt.

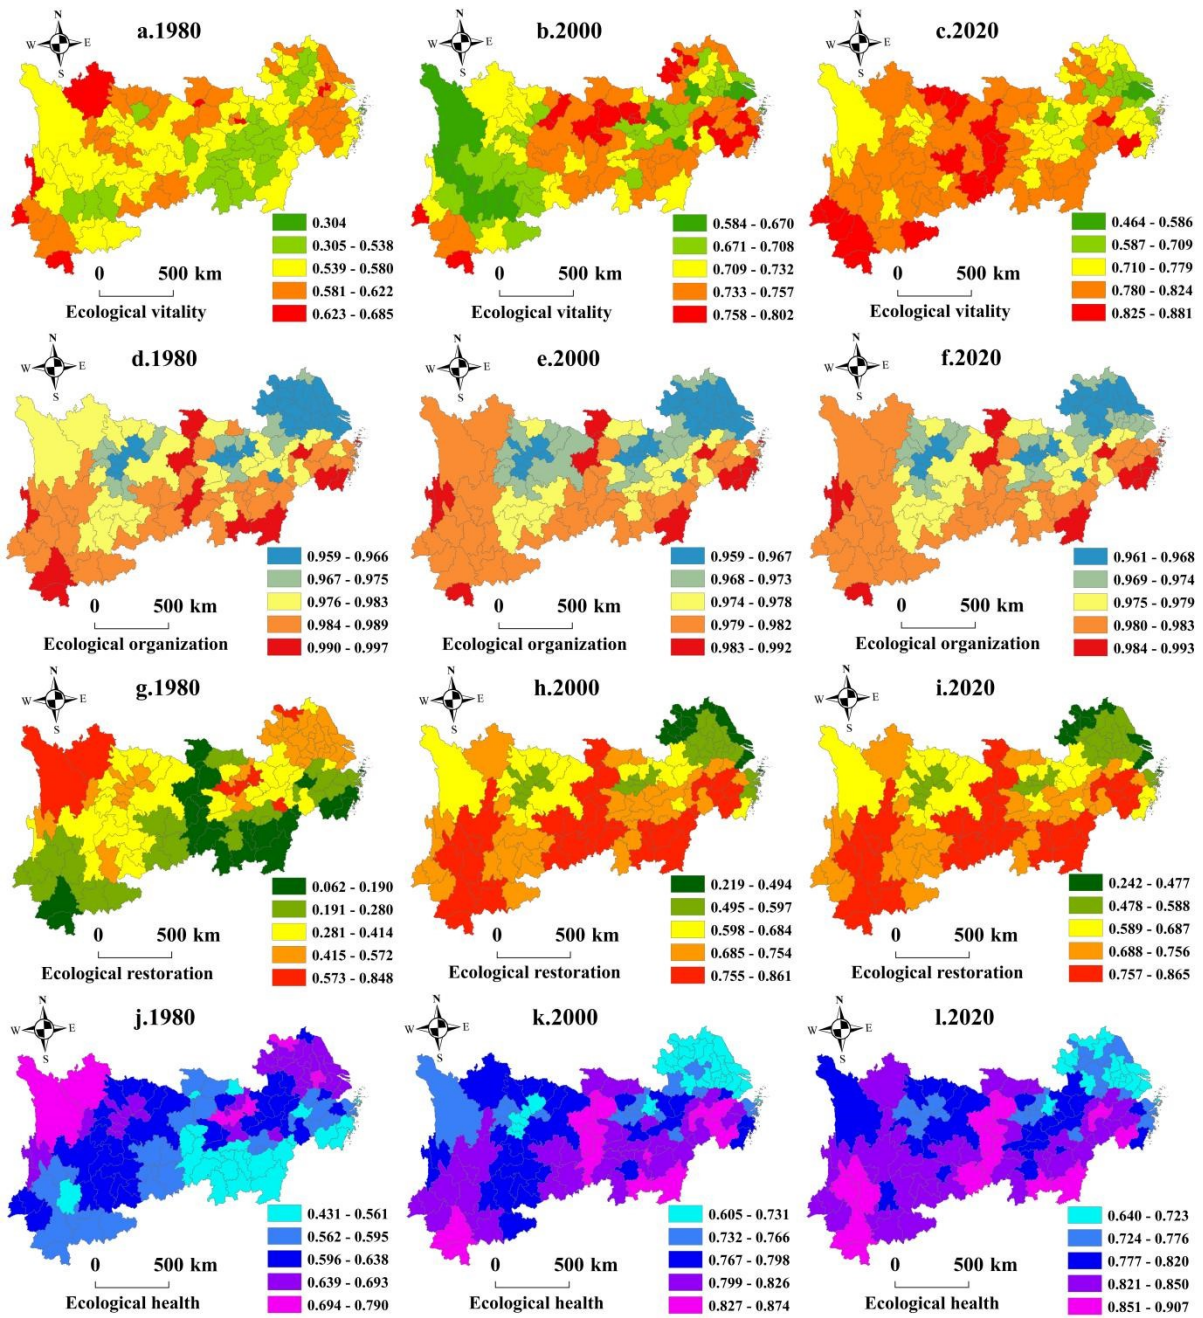

Figure. S2 Spatio-temporal distribution of ecological health index in the Yangtze River Economic Belt

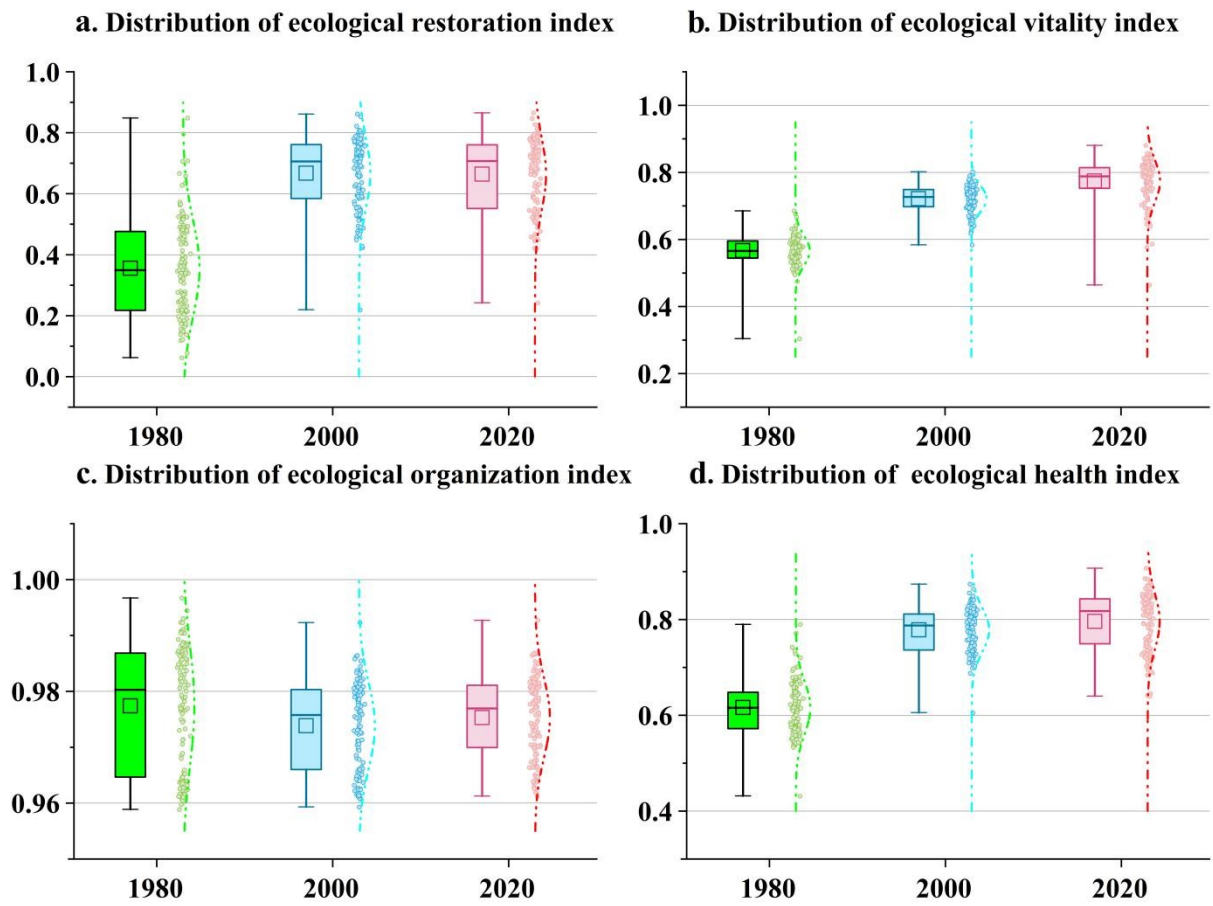

Figure. S3 Distribution of ecological health index in Yangtze River Economic Belt

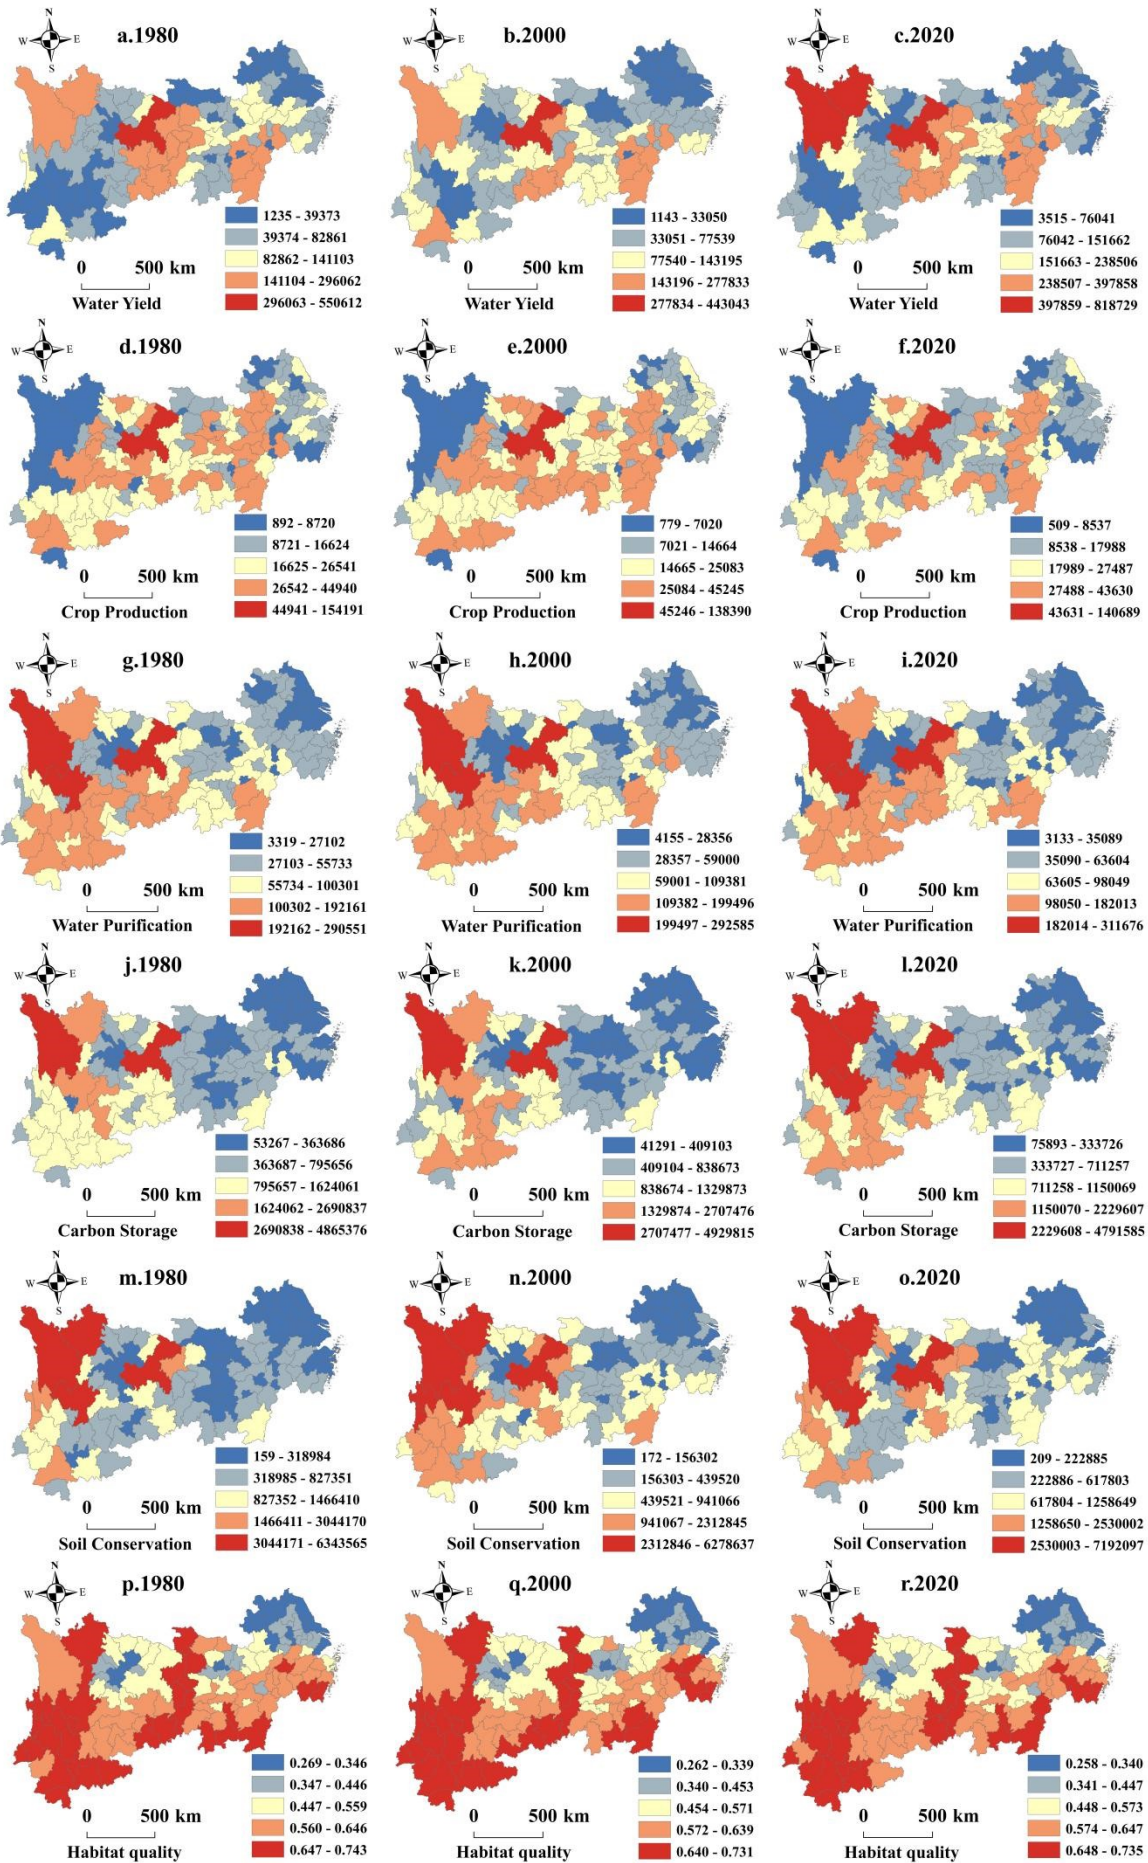

Figure. S4 Spatio-temporal distribution of ecosystem services in the Yangtze River Economic Belt

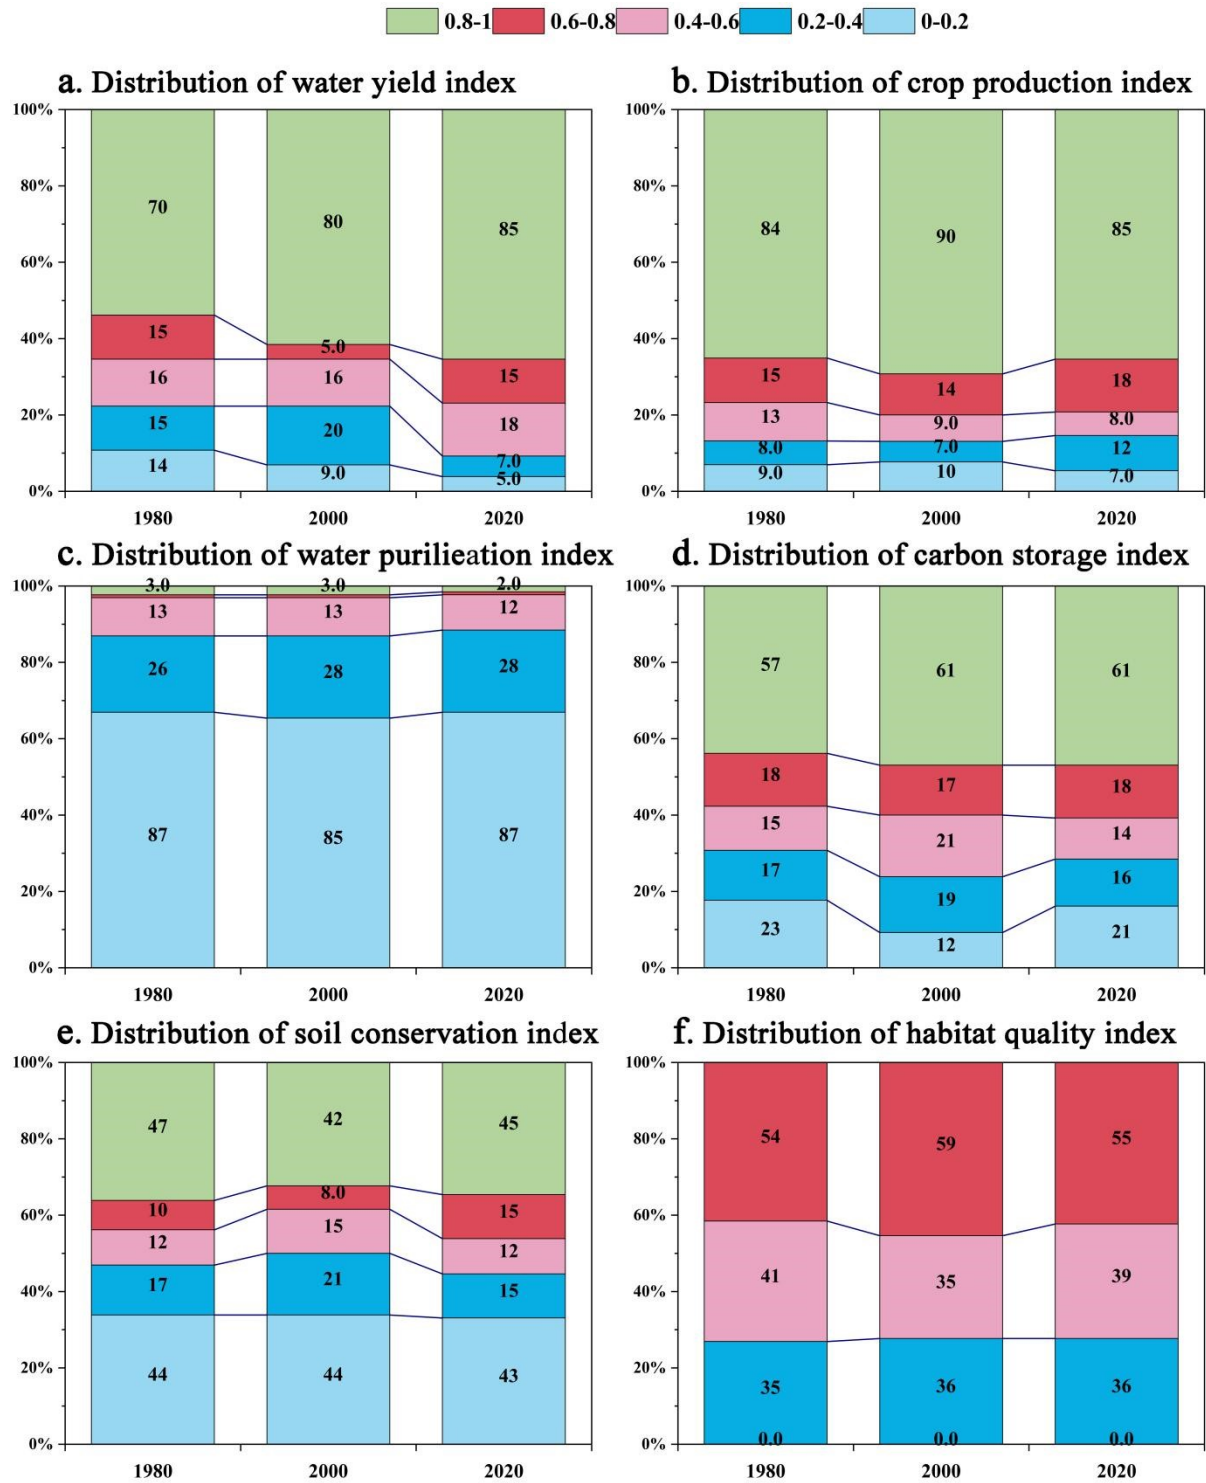

Figure. S5 Distribution of ecosystem service index in Yangtze River Economic Belt

Table S2 Estimated results of the OLS model from 1990 to 2020.

| 1980 | Variable  | Coefficient [a] | Standard deviation [t] | Statistic | Probability [b] | Robust_SE | Robust_t  | Robust_Pr [b] | VIF [c] |
|------|-----------|-----------------|------------------------|-----------|-----------------|-----------|-----------|---------------|---------|
|      | Intercept | 0.774786        | 0.013879               | 55.824596 | 0.000000*       | 0.015497  | 49.994598 | 0.000000*     | —       |



|      |                    |                 |                        |            |                 |           |            |               |           |
|------|--------------------|-----------------|------------------------|------------|-----------------|-----------|------------|---------------|-----------|
|      | Water yield        | -0.001416       | 0.036146               | -0.039172  | 0.96881         | 0.02623   | -0.053981  | 0.95703       | 2.542308  |
|      | Crop production    | -0.097423       | 0.047079               | -2.069347  | 0.040603*       | 0.043293  | -2.250344  | 0.026196*     | 2.72564   |
|      | Water purification | -0.094009       | 0.045232               | -2.078364  | 0.039750*       | 0.045812  | -2.052052  | 0.042282*     | 8.079755  |
|      | Carbon storage     | 0.194363        | 0.062055               | 3.132087   | 0.002176*       | 0.052545  | 3.698971   | 0.000332*     | 8.780968  |
|      | Soil conservation  | 0.123508        | 0.044856               | 2.75342    | 0.006790*       | 0.043375  | 2.847464   | 0.005167*     | 4.609552  |
|      | Habitat quality    | -0.307848       | 0.028273               | -10.888591 | 0.000000*       | 0.030595  | -10.062151 | 0.000000*     | 1.843707  |
|      | Variable           | Coefficient [a] | Standard deviation [t] | Statistic  | Probability [b] | Robust_SE | Robust_t   | Robust_Pr [b] | VIF [c]   |
|      | Intercept          | 0.625948        | 0.008737               | 71.639859  | 0.000000*       | 0.00658   | 95.125883  | 0.000000*     | —         |
| 2000 | Water yield        | 0.061606        | 0.024107               | 2.555476   | 0.011816*       | 0.014122  | 4.362327   | 0.000030*     | 3.114924  |
|      | Crop production    | 0.034894        | 0.027072               | 1.288922   | 0.199848        | 0.016835  | 2.072637   | 0.040290*     | 2.25875   |
|      | Water purification | 0.001447        | 0.027999               | 0.05168    | 0.95886         | 0.020849  | 0.069403   | 0.944774      | 7.760864  |
|      | Carbon storage     | -0.064065       | 0.039549               | -1.619893  | 0.107825        | 0.030628  | -2.091734  | 0.038514*     | 8.415929  |
|      | Soil conservation  | -0.033746       | 0.028361               | -1.189864  | 0.236391        | 0.026474  | -1.27469   | 0.204825      | 4.365189  |
|      | Habitat quality    | 0.282249        | 0.017373               | 16.246207  | 0.000000*       | 0.015167  | 18.609721  | 0.000000*     | 1.721178  |
|      | Variable           | Coefficient [a] | Standard deviation [t] | Statistic  | Probability [b] | Robust_SE | Robust_t   | Robust_Pr [b] | VIF [c]   |
|      | Intercept          | 0.598483        | 0.010018               | 59.739906  | 0.000000*       | 0.010863  | 55.094431  | 0.000000*     | —         |
| 2020 | Water yield        | -0.004057       | 0.026292               | -0.154294  | 0.877626        | 0.014859  | -0.273005  | 0.785312      | 3.192898  |
|      | Crop production    | 0.094241        | 0.032477               | 2.901757   | 0.004400*       | 0.024005  | 3.925913   | 0.000149*     | 2.106182  |
|      | Water purification | -0.037101       | 0.041134               | -0.901954  | 0.368835        | 0.037668  | -0.984948  | 0.326575      | 9.220682  |
|      | Carbon storage     | 0.00587         | 0.055043               | 0.106636   | 0.915244        | 0.040234  | 0.145885   | 0.884245      | 10.658015 |
|      | Soil conservation  | -0.010606       | 0.040584               | -0.261335  | 0.794275        | 0.023388  | -0.453477  | 0.651013      | 5.772952  |
|      | Habitat quality    | 0.368375        | 0.020243               | 18.198027  | 0.000000*       | 0.023149  | 15.913522  | 0.000000*     | 1.550545  |

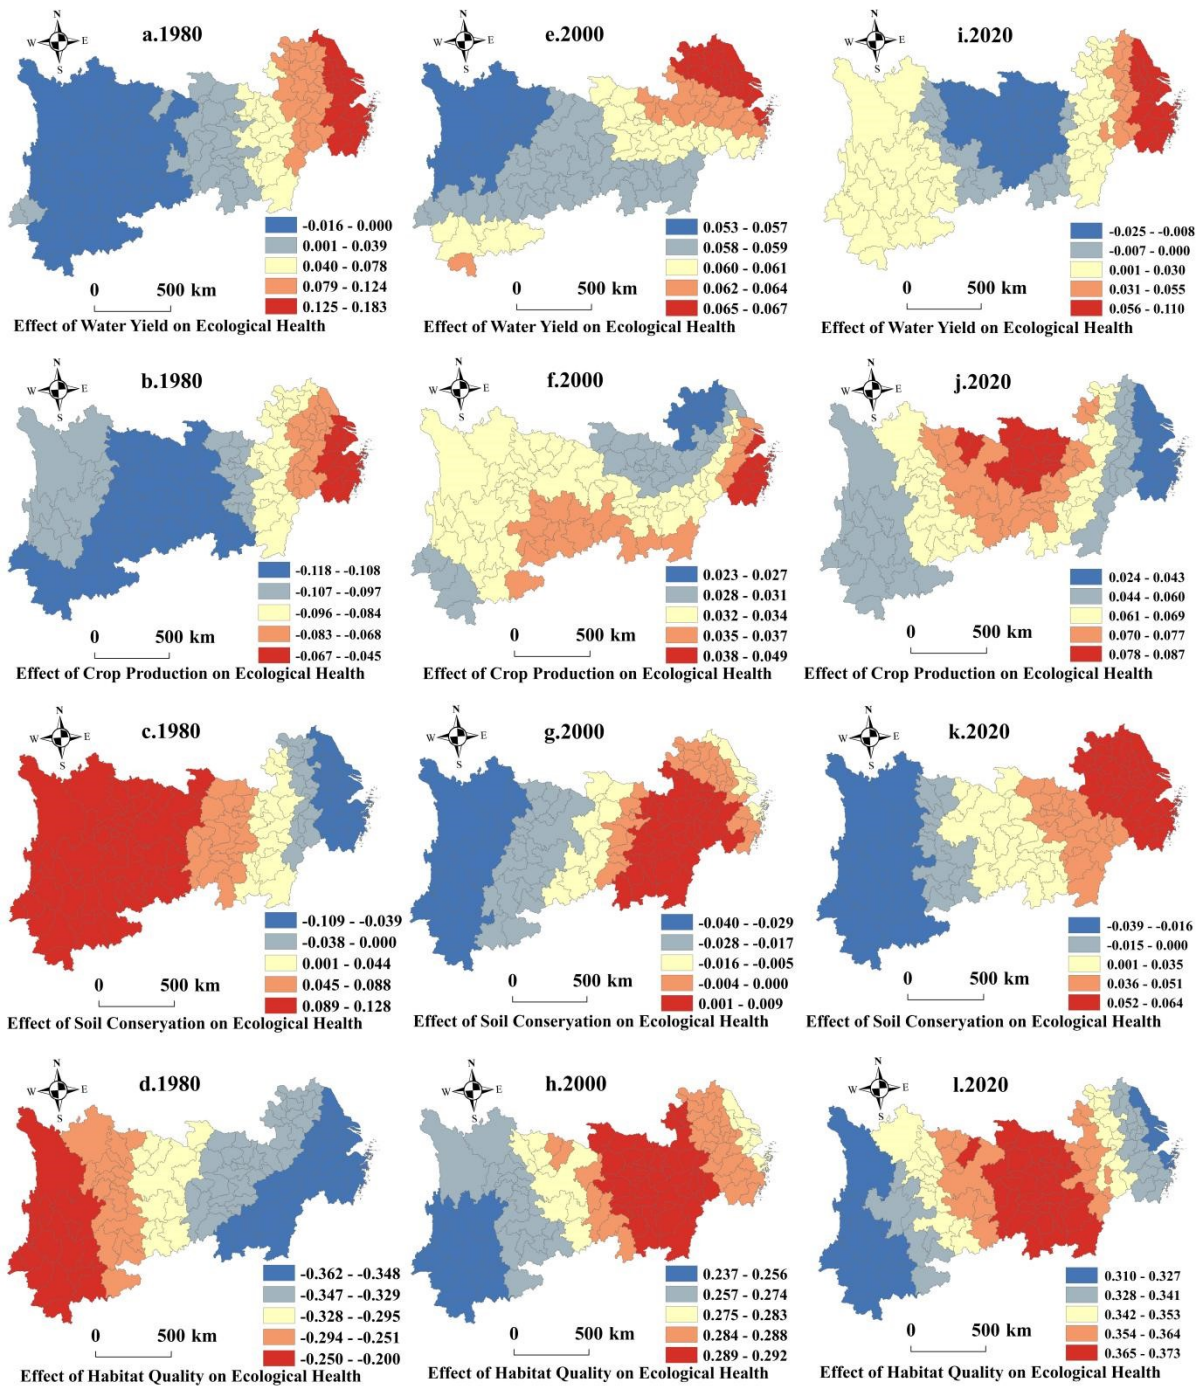

Figure. S6 Distribution of influence coefficient of ecosystem service index on ecological health index in Yangtze River Economic Belt
